# Supplementary material for: Predicting the pair correlation functions of silicate and borosilicate glasses using machine learning
Source: Royal Society of Chemistry journal article supplement (doi:10.1039/d3cp05136f), 2023-12-04
Supplement: d3cp05136f1.pdf [file d3cp05136f1.pdf]

## Supplementary Information (SI)

### Predicting the pair correlation functions of silicate and borosilicate glasses using machine learning

Kumar Ayush<sup>#</sup>, Pooja Sahu<sup>§</sup>, Sk. Musharaf Ali<sup>§</sup> and Tarak K Patra<sup>#</sup>

<sup>#</sup>Department of Chemical Engineering and Center for Atomistic Modeling and Materials Design, Indian Institute of Technology Madras, Chennai, TN 600036, India

<sup>§</sup>Chemical Engineering Division, Bhabha Atomic Research Center, Mumbai, 400085, India.

#### 1) Composition corresponding to the training data

The table provides the composition corresponding to each of the 184 datapoints used for training the model. It includes base compound(glass), dopant, concentration of dopant(mol%) and the pair of atoms between which the PCF is considered.

| S. No. | Base Compound       | Dopant           | Concentration of dopants (mol%) | Pair of Atoms |
|--------|---------------------|------------------|---------------------------------|---------------|
| 1      | Silicate            | BaO              | 70                              | Si-Ba         |
| 2      | Sodium Borosilicate | ZnO              | 9.8                             | Na-Zn         |
| 3      | Sodium Borosilicate | TiO <sub>2</sub> | 4.77                            | Si-Si         |
| 4      | Sodium Borosilicate | ZnO              | 9.8                             | O-O           |
| 5      | Sodium Borosilicate | TiO <sub>2</sub> | 19.97                           | Ti-Na         |
| 6      | Sodium Borosilicate | TiO <sub>2</sub> | 9.1                             | Si-Na         |
| 7      | Sodium Borosilicate | TiO <sub>2</sub> | 19.97                           | B-Ti          |
| 8      | Sodium Borosilicate | TiO <sub>2</sub> | 1.95                            | Na-O          |
| 9      | Sodium Borosilicate | TiO <sub>2</sub> | 13.06                           | Ti-O          |
| 10     | Sodium Silicate     | ZnO              | 10                              | Zn-Zn         |
| 11     | Sodium Borosilicate | TiO <sub>2</sub> | 4.77                            | B-Na          |
| 12     | Silicate            | BaO              | 50                              | Si-Si         |
| 13     | Sodium Borosilicate | BaO              | 1.95                            | O-O           |
| 14     | Silicate            | BaO              | 70                              | Ba-Ba         |
| 15     | Sodium Borosilicate | None             | 0                               | Si-Si         |
| 16     | Sodium Silicate     | ZnO              | 10                              | B-B           |
| 17     | Sodium Borosilicate | BaO              | 9.1                             | B-O           |
| 18     | Sodium Borosilicate | TiO <sub>2</sub> | 16.69                           | B-Na          |
| 19     | Silicate            | BaO              | 30                              | O-O           |
| 20     | Sodium Borosilicate | TiO <sub>2</sub> | 4.77                            | Si-O          |
| 21     | Sodium Borosilicate | TiO <sub>2</sub> | 1.95                            | Si-Si         |
| 22     | Sodium Borosilicate | TiO <sub>2</sub> | 4.77                            | B-Ti          |
| 23     | Silicate            | BaO              | 30                              | Si-O          |
| 24     | Sodium Borosilicate | BaO              | 1.95                            | B-Ba          |
| 25     | Sodium Borosilicate | TiO <sub>2</sub> | 16.69                           | Si-B          |

|    |                     |                  |       |       |
|----|---------------------|------------------|-------|-------|
| 26 | Sodium Borosilicate | TiO <sub>2</sub> | 19.97 | Ti-O  |
| 27 | Sodium Borosilicate | ZnO              | 12.6  | Na-Na |
| 28 | Silicate            | BaO              | 30    | Ba-Ba |
| 29 | Sodium Borosilicate | TiO <sub>2</sub> | 9.1   | Ti-Ti |
| 30 | Sodium Silicate     | ZnO              | 10    | Na-Na |
| 31 | Sodium Borosilicate | TiO <sub>2</sub> | 9.1   | Ti-O  |
| 32 | Silicate            | BaO              | 70    | O-O   |
| 33 | Sodium Borosilicate | BaO              | 1.95  | Ba-O  |
| 34 | Sodium Borosilicate | BaO              | 13.06 | Si-Si |
| 35 | Silicate            | BaO              | 10    | O-O   |
| 36 | Sodium Borosilicate | BaO              | 9.1   | Si-B  |
| 37 | Sodium Borosilicate | ZnO              | 6.1   | Na-Zn |
| 38 | Sodium Borosilicate | TiO <sub>2</sub> | 19.97 | Si-B  |
| 39 | Sodium Borosilicate | TiO <sub>2</sub> | 13.06 | Si-O  |
| 40 | Sodium Borosilicate | BaO              | 13.06 | Si-Ba |
| 41 | Sodium Borosilicate | TiO <sub>2</sub> | 16.69 | Na-O  |
| 42 | Sodium Borosilicate | ZnO              | 12.6  | Si-Si |
| 43 | Sodium Borosilicate | TiO <sub>2</sub> | 9.1   | B-Ti  |
| 44 | Sodium Borosilicate | BaO              | 4.77  | Si-B  |
| 45 | Sodium Borosilicate | TiO <sub>2</sub> | 19.97 | Ti-O  |
| 46 | Sodium Borosilicate | TiO <sub>2</sub> | 1.95  | Ti-Ti |
| 47 | Sodium Borosilicate | TiO <sub>2</sub> | 16.69 | B-Ti  |
| 48 | Sodium Borosilicate | TiO <sub>2</sub> | 4.77  | Ti-O  |
| 49 | Sodium Borosilicate | BaO              | 9.1   | O-O   |
| 50 | Sodium Silicate     | ZnO              | 10    | B-Na  |
| 51 | Sodium Borosilicate | None             | 0     | Si-Na |
| 52 | Sodium Silicate     | ZnO              | 10    | Zn-O  |
| 53 | Sodium Borosilicate | BaO              | 1.95  | Si-O  |
| 54 | Sodium Borosilicate | BaO              | 9.1   | Si-O  |
| 55 | Sodium Borosilicate | TiO <sub>2</sub> | 13.06 | B-Ti  |
| 56 | Sodium Borosilicate | BaO              | 9.1   | B-B   |
| 57 | Sodium Borosilicate | TiO <sub>2</sub> | 9.1   | B-O   |
| 58 | Sodium Borosilicate | TiO <sub>2</sub> | 4.77  | Si-B  |
| 59 | Sodium Borosilicate | TiO <sub>2</sub> | 16.69 | Ti-O  |
| 60 | Silicate            | ZnO              | 20    | O-O   |
| 61 | Sodium Borosilicate | TiO <sub>2</sub> | 16.69 | Na-O  |
| 62 | Sodium Borosilicate | TiO <sub>2</sub> | 19.97 | Si-Ti |
| 63 | Sodium Borosilicate | ZnO              | 9.8   | Zn-O  |
| 64 | Sodium Borosilicate | TiO <sub>2</sub> | 1.95  | Si-O  |
| 65 | Sodium Borosilicate | TiO <sub>2</sub> | 1.95  | B-O   |
| 66 | Silicate            | BaO              | 10    | Si-Si |
| 67 | Sodium Borosilicate | ZnO              | 9.8   | Si-O  |
| 68 | Sodium Borosilicate | BaO              | 4.77  | Ba-Ba |
| 69 | Sodium Borosilicate | BaO              | 9.1   | Na-O  |
| 70 | Silicate            | ZnO              | 20    | Zn-Zn |
| 71 | Sodium Silicate     | None             | 0     | Si-Si |
| 72 | Sodium Borosilicate | BaO              | 4.77  | Si-Si |

|            |                     |                  |       |       |
|------------|---------------------|------------------|-------|-------|
| <b>73</b>  | Sodium Borosilicate | BaO              | 13.06 | B-O   |
| <b>74</b>  | Sodium Silicate     | None             | 0     | B-Zn  |
| <b>75</b>  | Sodium Borosilicate | None             | 0     | Si-O  |
| <b>76</b>  | Silicate            | BaO              | 50    | Si-O  |
| <b>77</b>  | Sodium Borosilicate | BaO              | 13.06 | O-O   |
| <b>78</b>  | Sodium Borosilicate | TiO <sub>2</sub> | 4.77  | Ti-Ti |
| <b>79</b>  | Sodium Borosilicate | None             | 0     | Zn-Zn |
| <b>80</b>  | Sodium Borosilicate | ZnO              | 6.1   | Zn-Zn |
| <b>81</b>  | Sodium Borosilicate | TiO <sub>2</sub> | 16.69 | Si-O  |
| <b>82</b>  | Silicate            | BaO              | 10    | Si-O  |
| <b>83</b>  | Sodium Borosilicate | TiO <sub>2</sub> | 1.95  | Si-Na |
| <b>84</b>  | Sodium Borosilicate | BaO              | 1.95  | Si-Si |
| <b>85</b>  | Sodium Silicate     | ZnO              | 10    | O-O   |
| <b>86</b>  | Sodium Borosilicate | BaO              | 9.1   | Ba-Ba |
| <b>87</b>  | Sodium Borosilicate | TiO <sub>2</sub> | 1.95  | Na-O  |
| <b>88</b>  | Sodium Silicate     | ZnO              | 10    | Na-O  |
| <b>89</b>  | Sodium Borosilicate | ZnO              | 6.1   | Si-Na |
| <b>90</b>  | Sodium Borosilicate | TiO <sub>2</sub> | 9.1   | Si-Si |
| <b>91</b>  | Sodium Borosilicate | None             | 0     | Si-O  |
| <b>92</b>  | Silicate            | BaO              | 10    | Ba-Ba |
| <b>93</b>  | Sodium Borosilicate | BaO              | 1.95  | B-B   |
| <b>94</b>  | Sodium Borosilicate | TiO <sub>2</sub> | 9.1   | B-B   |
| <b>95</b>  | Sodium Borosilicate | BaO              | 1.95  | Si-B  |
| <b>96</b>  | Sodium Borosilicate | TiO <sub>2</sub> | 4.77  | Si-Na |
| <b>97</b>  | Sodium Borosilicate | BaO              | 13.06 | Na-O  |
| <b>98</b>  | Sodium Silicate     | ZnO              | 10    | Si-Na |
| <b>99</b>  | Sodium Borosilicate | ZnO              | 6.1   | O-O   |
| <b>100</b> | Sodium Borosilicate | TiO <sub>2</sub> | 4.77  | Si-Ti |
| <b>101</b> | Silicate            | BaO              | 70    | Si-Si |
| <b>102</b> | Sodium Borosilicate | ZnO              | 9.8   | Na-Na |
| <b>103</b> | Sodium Borosilicate | BaO              | 13.06 | B-B   |
| <b>104</b> | Sodium Borosilicate | TiO <sub>2</sub> | 9.1   | Ti-O  |
| <b>105</b> | Sodium Borosilicate | None             | 0     | Na-Na |
| <b>106</b> | Sodium Borosilicate | BaO              | 13.06 | Si-B  |
| <b>107</b> | Sodium Borosilicate | TiO <sub>2</sub> | 19.97 | Ti-Ti |
| <b>108</b> | Sodium Borosilicate | ZnO              | 12.6  | Na-O  |
| <b>109</b> | Sodium Borosilicate | BaO              | 13.06 | Si-O  |
| <b>110</b> | Sodium Borosilicate | TiO <sub>2</sub> | 4.77  | Ti-Na |
| <b>111</b> | Silicate            | BaO              | 30    | Si-Ba |
| <b>112</b> | Sodium Borosilicate | TiO <sub>2</sub> | 19.97 | Na-O  |
| <b>113</b> | Sodium Borosilicate | ZnO              | 6.1   | Na-O  |
| <b>114</b> | Sodium Borosilicate | ZnO              | 6.1   | Si-O  |
| <b>115</b> | Silicate            | ZnO              | 20    | B-Na  |
| <b>116</b> | Sodium Borosilicate | BaO              | 4.77  | Si-Ba |
| <b>117</b> | Sodium Silicate     | None             | 0     | O-O   |
| <b>118</b> | Sodium Borosilicate | TiO <sub>2</sub> | 1.95  | Si-Ti |
| <b>119</b> | Sodium Borosilicate | BaO              | 9.1   | Si-Si |

|            |                     |                  |       |       |
|------------|---------------------|------------------|-------|-------|
| <b>120</b> | Silicate            | BaO              | 70    | Si-O  |
| <b>121</b> | Sodium Borosilicate | TiO <sub>2</sub> | 1.95  | Si-B  |
| <b>122</b> | Sodium Borosilicate | TiO <sub>2</sub> | 19.97 | Na-O  |
| <b>123</b> | Sodium Borosilicate | TiO <sub>2</sub> | 13.06 | Si-Ti |
| <b>124</b> | Sodium Borosilicate | ZnO              | 6.1   | Na-O  |
| <b>125</b> | Sodium Borosilicate | ZnO              | 9.8   | Na-O  |
| <b>126</b> | Sodium Borosilicate | TiO <sub>2</sub> | 13.06 | Na-O  |
| <b>127</b> | Sodium Borosilicate | BaO              | 1.95  | B-O   |
| <b>128</b> | Sodium Borosilicate | BaO              | 4.77  | Ba-O  |
| <b>129</b> | Sodium Borosilicate | BaO              | 13.06 | B-Ba  |
| <b>130</b> | Sodium Borosilicate | ZnO              | 9.8   | B-B   |
| <b>131</b> | Sodium Borosilicate | TiO <sub>2</sub> | 13.06 | Na-O  |
| <b>132</b> | Silicate            | BaO              | 30    | Ba-O  |
| <b>133</b> | Sodium Borosilicate | None             | 0     | O-O   |
| <b>134</b> | Sodium Borosilicate | TiO <sub>2</sub> | 16.69 | Si-Si |
| <b>135</b> | Sodium Borosilicate | ZnO              | 6.1   | B-O   |
| <b>136</b> | Sodium Borosilicate | TiO <sub>2</sub> | 1.95  | Ti-O  |
| <b>137</b> | Sodium Borosilicate | ZnO              | 12.6  | B-Zn  |
| <b>138</b> | Sodium Silicate     | None             | 0     | B-Na  |
| <b>139</b> | Sodium Borosilicate | BaO              | 13.06 | Ba-Ba |
| <b>140</b> | Silicate            | BaO              | 50    | Si-Ba |
| <b>141</b> | Sodium Borosilicate | TiO <sub>2</sub> | 13.06 | Ti-Na |
| <b>142</b> | Sodium Borosilicate | BaO              | 9.1   | Si-Ba |
| <b>143</b> | Sodium Borosilicate | ZnO              | 9.8   | Si-Na |
| <b>144</b> | Sodium Borosilicate | ZnO              | 12.6  | B-O   |
| <b>145</b> | Sodium Borosilicate | ZnO              | 12.6  | Si-Si |
| <b>146</b> | Sodium Borosilicate | None             | 0     | Na-Zn |
| <b>147</b> | Sodium Borosilicate | ZnO              | 12.6  | Zn-Si |
| <b>148</b> | Sodium Borosilicate | ZnO              | 12.6  | O-O   |
| <b>149</b> | Sodium Borosilicate | BaO              | 9.1   | B-Ba  |
| <b>150</b> | Sodium Borosilicate | BaO              | 1.95  | Si-Ba |
| <b>151</b> | Sodium Borosilicate | TiO <sub>2</sub> | 9.1   | Na-O  |
| <b>152</b> | Sodium Borosilicate | BaO              | 4.77  | Na-O  |
| <b>153</b> | Sodium Borosilicate | BaO              | 4.77  | B-Ba  |
| <b>154</b> | Sodium Borosilicate | ZnO              | 6.1   | Zn-O  |
| <b>155</b> | Sodium Borosilicate | ZnO              | 9.8   | Zn-Zn |
| <b>156</b> | Sodium Borosilicate | ZnO              | 6.1   | Si-Si |
| <b>157</b> | Sodium Borosilicate | ZnO              | 6.1   | Na-Na |
| <b>158</b> | Sodium Borosilicate | TiO <sub>2</sub> | 4.77  | Na-O  |
| <b>159</b> | Silicate            | BaO              | 30    | Si-Si |
| <b>160</b> | Sodium Borosilicate | TiO <sub>2</sub> | 19.97 | Si-O  |
| <b>161</b> | Sodium Borosilicate | ZnO              | 9.8   | Zn-Si |
| <b>162</b> | Sodium Borosilicate | BaO              | 4.77  | Si-O  |
| <b>163</b> | Silicate            | BaO              | 10    | Si-Ba |
| <b>164</b> | Sodium Borosilicate | TiO <sub>2</sub> | 13.06 | B-B   |
| <b>165</b> | Sodium Borosilicate | TiO <sub>2</sub> | 9.1   | Na-O  |
| <b>166</b> | Sodium Borosilicate | TiO <sub>2</sub> | 19.97 | B-B   |

|            |                     |                  |       |       |
|------------|---------------------|------------------|-------|-------|
| <b>167</b> | Sodium Borosilicate | TiO <sub>2</sub> | 19.97 | B-O   |
| <b>168</b> | Sodium Borosilicate | TiO <sub>2</sub> | 4.77  | B-O   |
| <b>169</b> | Sodium Borosilicate | TiO <sub>2</sub> | 1.95  | B-Na  |
| <b>170</b> | Sodium Borosilicate | TiO <sub>2</sub> | 4.77  | Na-O  |
| <b>171</b> | Sodium Borosilicate | ZnO              | 9.8   | B-O   |
| <b>172</b> | Sodium Borosilicate | TiO <sub>2</sub> | 1.95  | B-Ti  |
| <b>173</b> | Sodium Borosilicate | None             | 0     | Zn-Si |
| <b>174</b> | Sodium Borosilicate | ZnO              | 12.6  | B-Na  |
| <b>175</b> | Sodium Borosilicate | TiO <sub>2</sub> | 19.97 | B-Na  |
| <b>176</b> | Sodium Borosilicate | ZnO              | 12.6  | Na-Zn |
| <b>177</b> | Sodium Borosilicate | BaO              | 1.95  | Na-O  |
| <b>178</b> | Sodium Borosilicate | ZnO              | 9.8   | Si-Si |
| <b>179</b> | Sodium Borosilicate | TiO <sub>2</sub> | 13.06 | Si-Si |
| <b>180</b> | Sodium Borosilicate | TiO <sub>2</sub> | 9.1   | Ti-Na |
| <b>181</b> | Sodium Borosilicate | BaO              | 9.1   | Ba-O  |
| <b>182</b> | Sodium Borosilicate | TiO <sub>2</sub> | 1.95  | Ti-O  |
| <b>183</b> | Sodium Borosilicate | ZnO              | 12.6  | Si-O  |
| <b>184</b> | Sodium Borosilicate | TiO <sub>2</sub> | 16.69 | B-O   |

## 2) Composition corresponding to the test data

The table provides the composition corresponding to each of the test dataset (47 points) used for testing the performance of the model. It includes base compound(glass), dopant, concentration of dopant(mol%) and the pair of atoms between which the PCF is considered.

| S. No. | Base Compound       | Dopant           | Concentration of dopants (mol%) | Pair of Atoms |
|--------|---------------------|------------------|---------------------------------|---------------|
| 1      | Sodium Silicate     | None             | 0                               | Zn-Si         |
| 2      | Silicate            | BaO              | 50                              | Ba-Ba         |
| 3      | Sodium Borosilicate | BaO              | 4.77                            | B-O           |
| 4      | Sodium Silicate     | None             | 0                               | Si-Na         |
| 5      | Sodium Borosilicate | BaO              | 13.06                           | Ba-O          |
| 6      | Silicate            | ZnO              | 20                              | B-O           |
| 7      | Sodium Borosilicate | BaO              | 4.77                            | O-O           |
| 8      | Sodium Borosilicate | ZnO              | 6.1                             | B-B           |
| 9      | Sodium Borosilicate | TiO <sub>2</sub> | 9.1                             | Si-O          |
| 10     | Sodium Borosilicate | TiO <sub>2</sub> | 16.69                           | Si-Na         |
| 11     | Sodium Borosilicate | ZnO              | 6.1                             | Zn-Si         |
| 12     | Silicate            | BaO              | 70                              | Ba-O          |
| 13     | Sodium Borosilicate | TiO <sub>2</sub> | 16.69                           | Ti-O          |
| 14     | Sodium Borosilicate | ZnO              | 9.8                             | Si-O          |
| 15     | Sodium Borosilicate | ZnO              | 12.6                            | Si-Na         |
| 16     | Sodium Borosilicate | TiO <sub>2</sub> | 13.06                           | Ti-O          |
| 17     | Sodium Borosilicate | TiO <sub>2</sub> | 1.95                            | B-B           |
| 18     | Silicate            | BaO              | 50                              | O-O           |
| 19     | Sodium Silicate     | ZnO              | 10                              | B-Zn          |
| 20     | Sodium Silicate     | ZnO              | 10                              | Si-Si         |
| 21     | Sodium Borosilicate | TiO <sub>2</sub> | 16.69                           | Ti-Na         |
| 22     | Sodium Borosilicate | ZnO              | 12.6                            | Zn-O          |
| 23     | Sodium Borosilicate | ZnO              | 9.8                             | Na-O          |
| 24     | Sodium Borosilicate | ZnO              | 6.1                             | Si-O          |
| 25     | Sodium Borosilicate | TiO <sub>2</sub> | 13.06                           | Si-Na         |
| 26     | Silicate            | BaO              | 50                              | Ba-O          |
| 27     | Sodium Borosilicate | TiO <sub>2</sub> | 4.77                            | B-B           |
| 28     | Sodium Borosilicate | TiO <sub>2</sub> | 13.06                           | B-O           |
| 29     | Sodium Borosilicate | TiO <sub>2</sub> | 1.95                            | Ti-Na         |
| 30     | Sodium Borosilicate | TiO <sub>2</sub> | 16.69                           | Si-Ti         |
| 31     | Sodium Borosilicate | ZnO              | 12.6                            | B-B           |
| 32     | Sodium Borosilicate | BaO              | 1.95                            | Ba-Ba         |
| 33     | Sodium Borosilicate | TiO <sub>2</sub> | 9.1                             | B-Na          |
| 34     | Sodium Borosilicate | BaO              | 4.77                            | B-B           |
| 35     | Silicate            | BaO              | 10                              | Ba-O          |
| 36     | Sodium Borosilicate | TiO <sub>2</sub> | 19.97                           | Si-Na         |
| 37     | Silicate            | ZnO              | 20                              | Zn-O          |
| 38     | Sodium Borosilicate | TiO <sub>2</sub> | 13.06                           | B-Na          |
| 39     | Sodium Borosilicate | TiO <sub>2</sub> | 9.1                             | Si-Ti         |

|    |                     |                  |       |       |
|----|---------------------|------------------|-------|-------|
| 40 | Sodium Borosilicate | TiO <sub>2</sub> | 16.69 | Ti-Ti |
| 41 | Sodium Borosilicate | TiO <sub>2</sub> | 4.77  | Ti-O  |
| 42 | Silicate            | ZnO              | 20    | Na-Na |
| 43 | Sodium Borosilicate | TiO <sub>2</sub> | 13.06 | Ti-Ti |
| 44 | Sodium Borosilicate | TiO <sub>2</sub> | 19.97 | Si-Si |
| 45 | Sodium Borosilicate | TiO <sub>2</sub> | 13.06 | Si-B  |
| 46 | Sodium Borosilicate | TiO <sub>2</sub> | 9.1   | Si-B  |
| 47 | Sodium Borosilicate | TiO <sub>2</sub> | 16.69 | B-B   |

### 3) Composition table for each RDF in Figure 9 of the main text

Figure 9 in the main text displays nine Pair Correlation Functions (PCF) depicting both actual and predicted curves. The composition details of these functions are provided below.

| S. No. | Base Compound       | Dopant           | Concentration of dopants (mol%) | Pair of Atoms |
|--------|---------------------|------------------|---------------------------------|---------------|
| 1      | Sodium Silicate     | None             | 0                               | Zn-Si         |
| 2      | Silicate            | BaO              | 50                              | Ba-Ba         |
| 3      | Sodium Borosilicate | BaO              | 4.77                            | B-O           |
| 4      | Sodium Silicate     | None             | 0                               | Si-Na         |
| 5      | Sodium Borosilicate | BaO              | 13.06                           | Ba-O          |
| 6      | Silicate            | ZnO              | 20                              | B-O           |
| 7      | Sodium Borosilicate | BaO              | 4.77                            | O-O           |
| 8      | Sodium Borosilicate | ZnO              | 6.1                             | B-B           |
| 9      | Sodium Borosilicate | TiO <sub>2</sub> | 9.1                             | Si-O          |
